# Supplementary material for: CRISPR loci-PCR as Tool for Tracking Azospirillum sp. Strain B510
Source: MDPI journal article supplement (doi:10.3390/microorganisms9071351), 2021-06-22
Supplement: s1 [file s1]

Supplementary Material

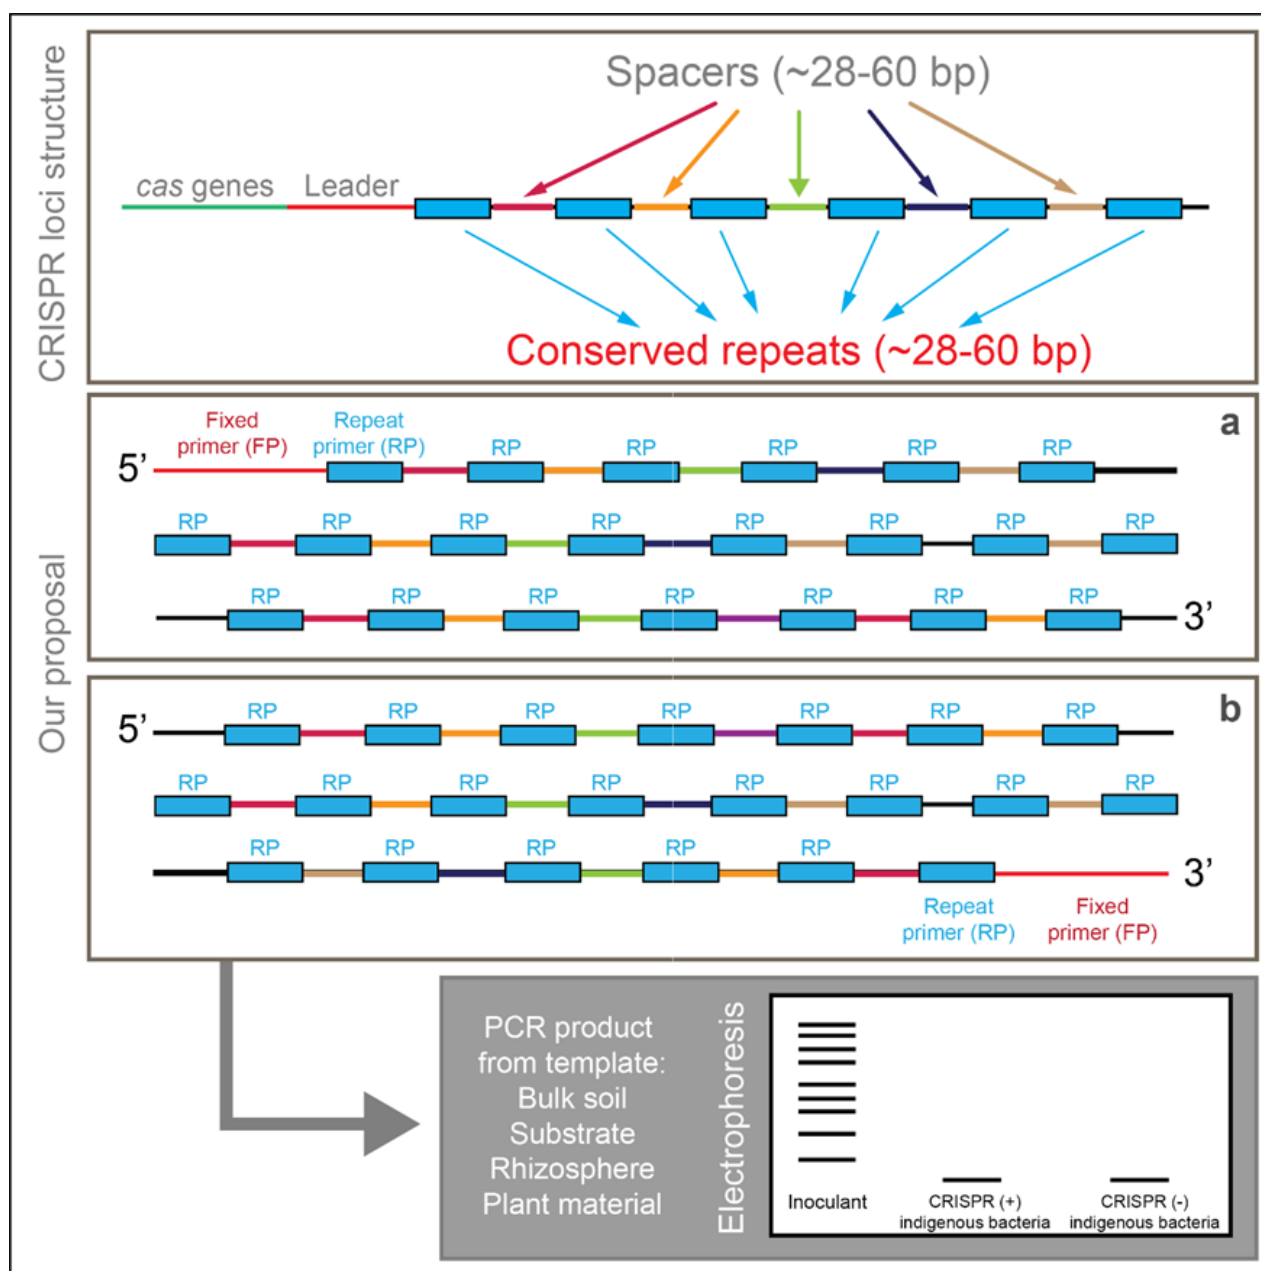

**Figure S1.** Proposed strategy for the tracking of a specific *Azospirillum* strain based on combined use of PCR and CRISPR loci structure. (a) Primers designed for CRISPR<sub>loci</sub>-PCR approach using fixed primer (FP) as forward primer and repeat primer (RP; complementary to conserved sequence repeats) as reverse primer. (b) Primers designed for CRISPR<sub>loci</sub>-PCR approach using repeat primer (RP; complementary to conserved sequence repeats) as forward primer and fixed primer (FP) as reverse primer. Target bacterium is named as “Inoculant”.
